# Supplementary material
Source: publisher figshare collection journal article supplement (https://acs.figshare.com/ndownloader/files/12948041)
Supplement: Supplementary file 1 [file 12948041]

## Supporting Information

# Ultra-Low-Temperature Ozone Abatement on $\alpha$ -MnO<sub>2</sub>(001) Facets with Down-Shifted Lowest Unoccupied Orbitals

Yaxin Chen,<sup>†</sup> Weiye Qu,<sup>†</sup> Chao Li,<sup>†</sup> Junxiao Chen,<sup>†</sup> Zhen Ma,<sup>†,‡</sup> and Xingfu Tang<sup>\*,†,‡</sup>

<sup>†</sup> Shanghai Key Laboratory of Atmospheric Particle Pollution & Prevention (LAP<sup>3</sup>), Department of Environmental Science & Engineering, Fudan University, Shanghai 200433, China

<sup>‡</sup> Shanghai Institute of Pollution Control & Ecological Security, Shanghai 200092, China

Tel: +86-21-31248935. E-mail: tangxf@fudan.edu.cn

**Pages S1-S11**

**Methods in detail**

**Tables S1-S2**

**Figures S1-S7**

## Contents

### Methods in detail

**Table S1.** Specific surface areas of  $\alpha$ -MnO<sub>2</sub> sheet,  $\alpha$ -MnO<sub>2</sub> rod, and  $\beta$ -MnO<sub>2</sub>.

**Table S2.** EXAFS parameters of  $\alpha$ -MnO<sub>2</sub> sheet and  $\alpha$ -MnO<sub>2</sub> rod at the Mn *K*-edge.

**Figure S1.** XRD patterns of  $\alpha$ -MnO<sub>2</sub> sheet and  $\alpha$ -MnO<sub>2</sub> rod.

**Figure S2.** HRTEM image of  $\alpha$ -MnO<sub>2</sub> sheets.

**Figure S3.**  $\chi(R)$   $k^2$ -weighted FT EXAFS spectra at the Mn *K*-edge of  $\alpha$ -MnO<sub>2</sub> sheet and  $\alpha$ -MnO<sub>2</sub> rod.

**Figure S4.** *R*-space and inverse FT spectra at the Mn *K*-edge of  $\alpha$ -MnO<sub>2</sub> sheet and  $\alpha$ -MnO<sub>2</sub> rod.

**Figure S5.** X-ray absorption spectra of  $\alpha$ -MnO<sub>2</sub> sheet and  $\alpha$ -MnO<sub>2</sub> rod at the Mn *K*-edge.

**Figure S6.**  $X_{O_3}$  as a function of temperature (*T*) over  $\alpha$ -MnO<sub>2</sub> sheets.

**Figure S7.** Valence-band XPS of  $\alpha$ -MnO<sub>2</sub> sheets and  $\beta$ -MnO<sub>2</sub>.

## Materials and methods in detail

**Catalytic Evaluation.** The catalytic performance for ozone removal was evaluated in a fixed-bed quartz reactor (i.d. = 8 mm) under an atmospheric pressure, using 0.2 g catalyst (40–60 mesh) for each run. Data were recorded by a temperature-programmed mode at a ramping rate of 2 °C min<sup>-1</sup>. O<sub>3</sub> was generated using ozonator (Guangdong Chuanghuan Ozone Electric Equipment Company, China). The total flow rate through the reactor was maintained at 1.7 L/min (0.5 vol% O<sub>2</sub> and Ar balance) and the inlet ozone concentration maintained at ~60 ppm. The ozone concentration was determined with an ozone analyzer (Model 49i, Thermo Scientific, USA).

**Material Characterization.** X-ray diffraction (XRD) patterns were obtained at a Rigaku Ultima-IV diffractometer (Japan) with Cu K $\alpha$  radiation ( $\lambda$  = 1.5406 Å). Transmission electron microscopy (TEM) and high-resolution TEM (HRTEM) studies were conducted on a JEM 2100F transmission electron microscope. XANES and EXAFS spectra were obtained at the Mn *K*-edges at BL14W of the SSRF with an electron beam energy of 3.5 GeV and a ring current of 200–300 mA. Data were collected with a fixed exit monochromator using two flat Si(111) crystals for the *K*-edge XAS measurements. The raw data were analyzed by using the IFEFFIT 1.2.11 software package. Soft X-ray absorption spectra at the Mn *L*<sub>3</sub>-edges were obtained in a total electron yield (TEY) mode at the 4B9B of the Beijing Synchrotron Radiation Facility (BSRF). X-ray photoelectron (XPS) spectra were obtained at BL 4B9B in the BSRF at a photon energy of 780 eV. All the data were recorded in an ultrahigh vacuum chamber equipped with a VG Scienta R4000 electron energy analyzer with a base pressure of  $\sim 4 \times 10^{-11}$  mbar at room temperature. BE of these valence-band spectra were calibrated with respect to the Au 4f<sub>7/2</sub> (BE = 84 eV) featured from a clean gold foil attached to the manipulator. The specific surface areas (SBET) were determined by using linear portion of Brunauer–Emmett–Teller (BET) model. The BET surface areas were measured by N<sub>2</sub> adsorption at a liquid nitrogen temperature using a NOVA4000e (USA, Quantachrome) automated gas sorption system.

## Tables and Figures

**Table S1.** Specific surface areas of  $\alpha$ -MnO<sub>2</sub> sheet,  $\alpha$ -MnO<sub>2</sub> rod, and  $\beta$ -MnO<sub>2</sub>.

| Samples                                | $\alpha$ -MnO <sub>2</sub> sheet | $\alpha$ -MnO <sub>2</sub> rod | $\beta$ -MnO <sub>2</sub> |
|----------------------------------------|----------------------------------|--------------------------------|---------------------------|
| $S_{\text{BET}}/(\text{m}^2/\text{g})$ | 76                               | 59                             | 15                        |

**Table S2.** EXAFS parameters of  $\alpha$ -MnO<sub>2</sub> sheet and  $\alpha$ -MnO<sub>2</sub> rod at the Mn *K*-edge.

| Samples                          | Shell | $CN$ <sup>[a]</sup> | $R$ <sup>[b]</sup> / Å | $\sigma^2$ <sup>[c]</sup> / Å <sup>2</sup> | $\Delta E_0$ <sup>[d]</sup> / eV |
|----------------------------------|-------|---------------------|------------------------|--------------------------------------------|----------------------------------|
| $\alpha$ -MnO <sub>2</sub> sheet | Mn-O  | 6                   | 1.90(5)                | 0.005(7)                                   | 2.1                              |
|                                  | Mn-Mn | 3.2                 | 2.82(4)                | 0.007(6)                                   | -4.9                             |
| $\alpha$ -MnO <sub>2</sub> rod   | Mn-O  | 6                   | 1.88(7)                | 0.005(3)                                   | -0.1                             |
|                                  | Mn-Mn | 4                   | 2.90(4)                | 0.008(3)                                   | 0.03                             |

$R$ -space fit,  $\Delta k = 2\text{-}12.3 \text{ \AA}^{-1}$ ,  $\Delta r = 1.1\text{-}4 \text{ \AA}$ ;

<sup>[a]</sup>  $CN$ , coordination number;

<sup>[b]</sup>  $R$ , distance between absorber and backscatter atoms;

<sup>[c]</sup>  $\sigma^2$ , Debye-Waller factor;

<sup>[d]</sup>  $\Delta E_0$ , energy shift.

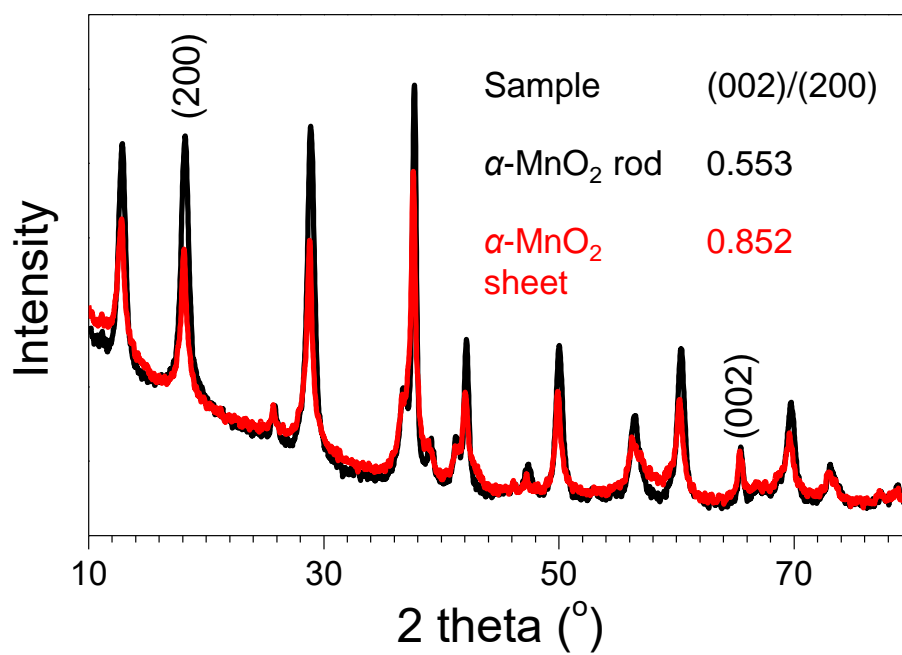

**Figure S1.** XRD patterns of  $\alpha$ -MnO<sub>2</sub> sheet and  $\alpha$ -MnO<sub>2</sub> rod. Inset: The ratios of FWHM between (002) and (200) diffraction peaks.

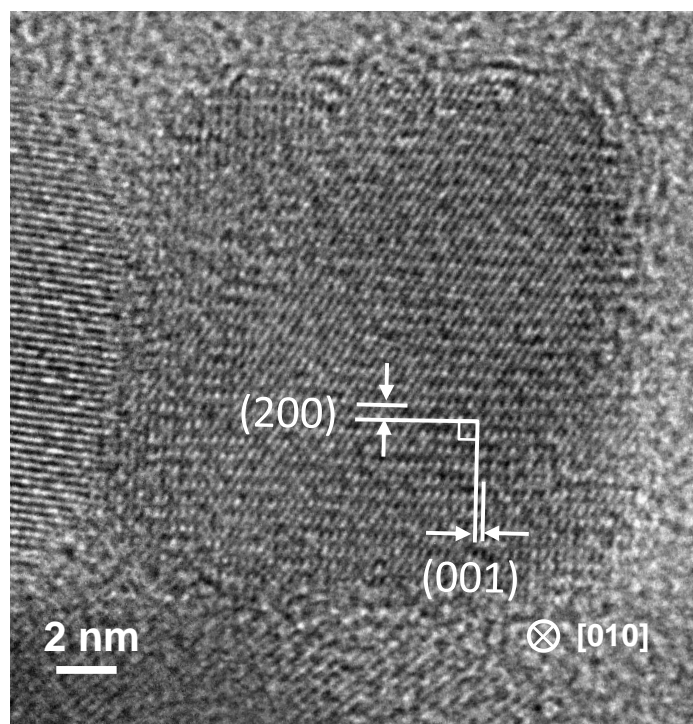

**Figure S2.** HRTEM image of  $\alpha$ -MnO<sub>2</sub> sheets.

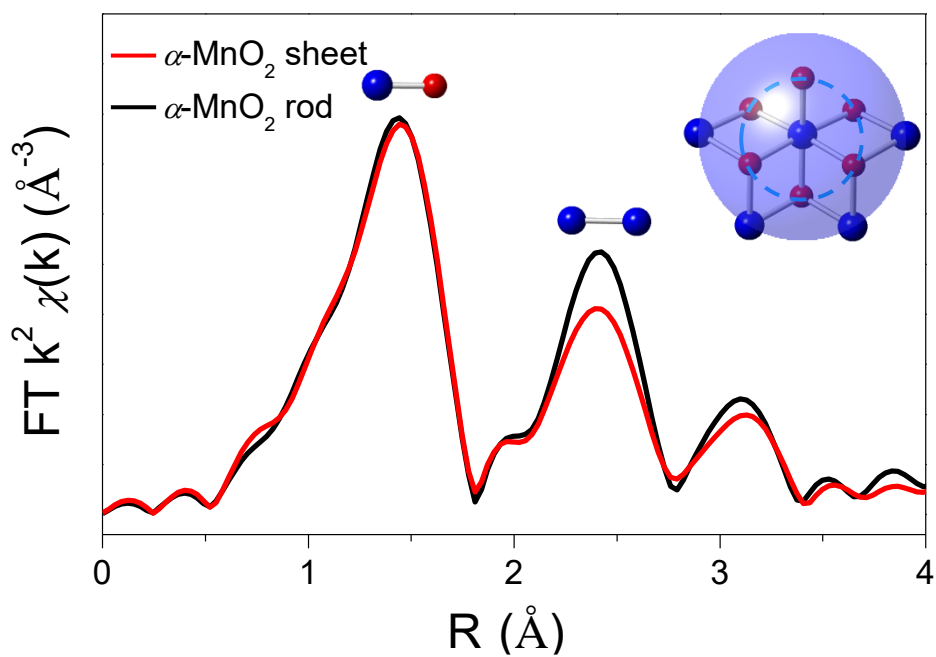

**Figure S3.**  $\chi(R)$   $k^2$ -weighted FT EXAFS spectra at the Mn  $K$ -edge of  $\alpha$ -MnO<sub>2</sub> sheet and  $\alpha$ -MnO<sub>2</sub> rod.

Blue and red balls represent Mn and O atoms, respectively. The inset models shows four Mn atoms (blue) and six O atoms (red) within a shell with a radius of approximately 3.0  $\text{\AA}$  of the Mn center.

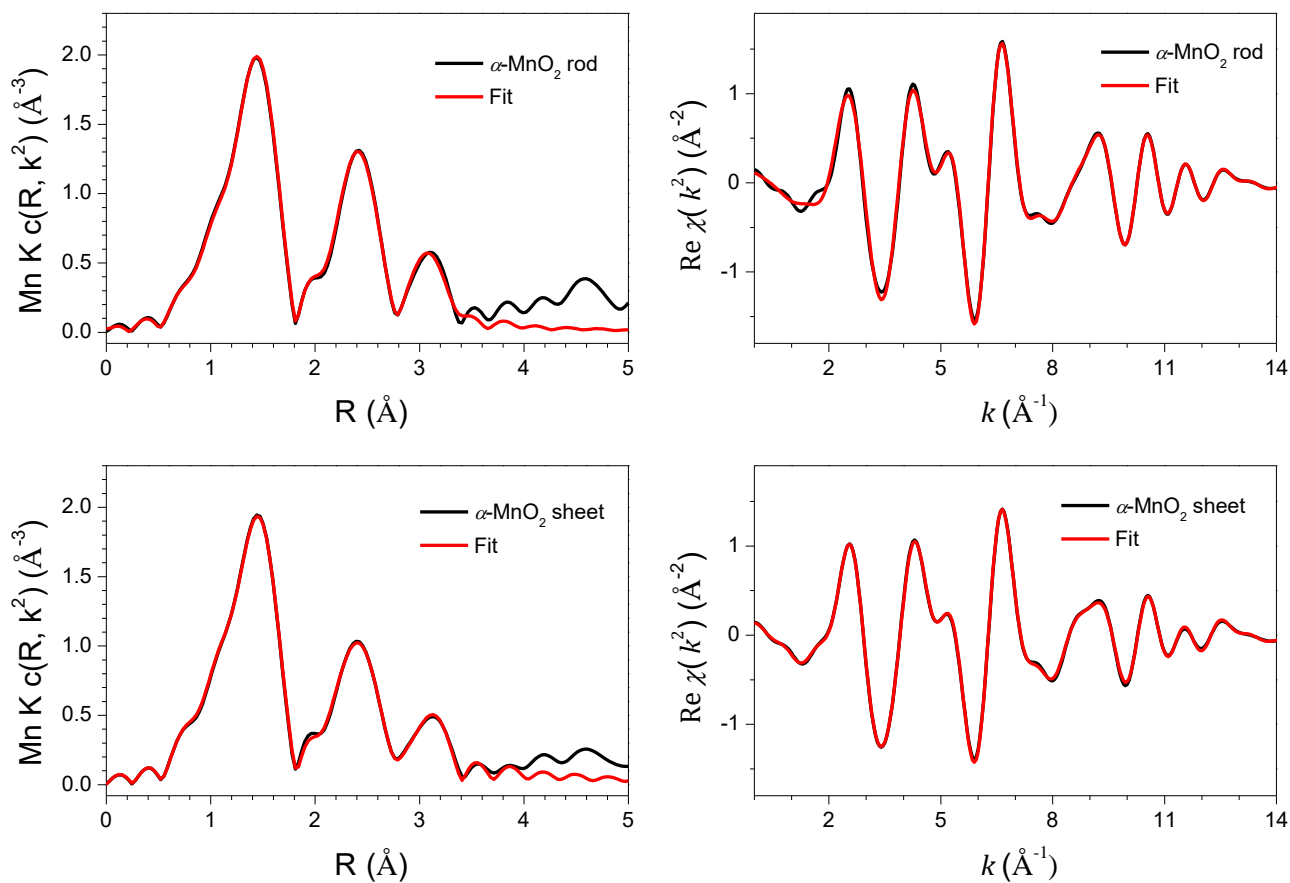

**Figure S4.**  $R$ -space ( $\Delta k = 2\text{-}12.3 \text{\AA}^{-1}$ ) and inverse FT spectra ( $\Delta r = 1.1\text{-}4.0 \text{\AA}$ ) at the Mn  $K$ -edge of  $\alpha$ -MnO<sub>2</sub> sheet and  $\alpha$ -MnO<sub>2</sub> rod.



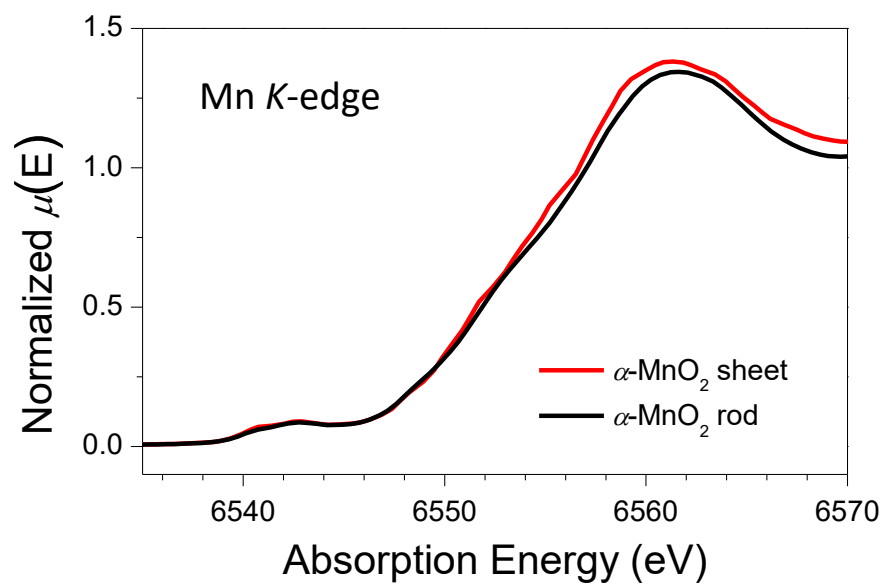

**Figure S5.** X-ray absorption spectra of  $\alpha$ -MnO<sub>2</sub> sheet and  $\alpha$ -MnO<sub>2</sub> rod at the Mn K-edge.

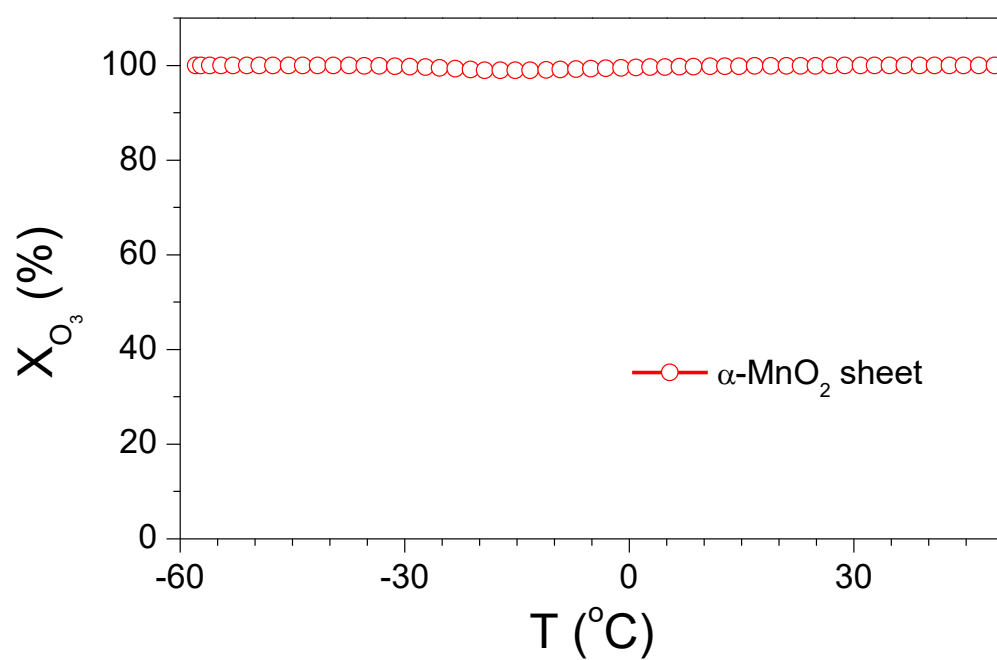

**Figure S6.**  $X_{O_3}$  as a function of temperature ( $T$ ) over  $\alpha$ - $MnO_2$  sheets. Reaction Conditions: 60 ppm  $O_3$ , 0.5 vol%  $O_2$  and Ar balance, gaseous hourly space velocity 460,000  $h^{-1}$ .

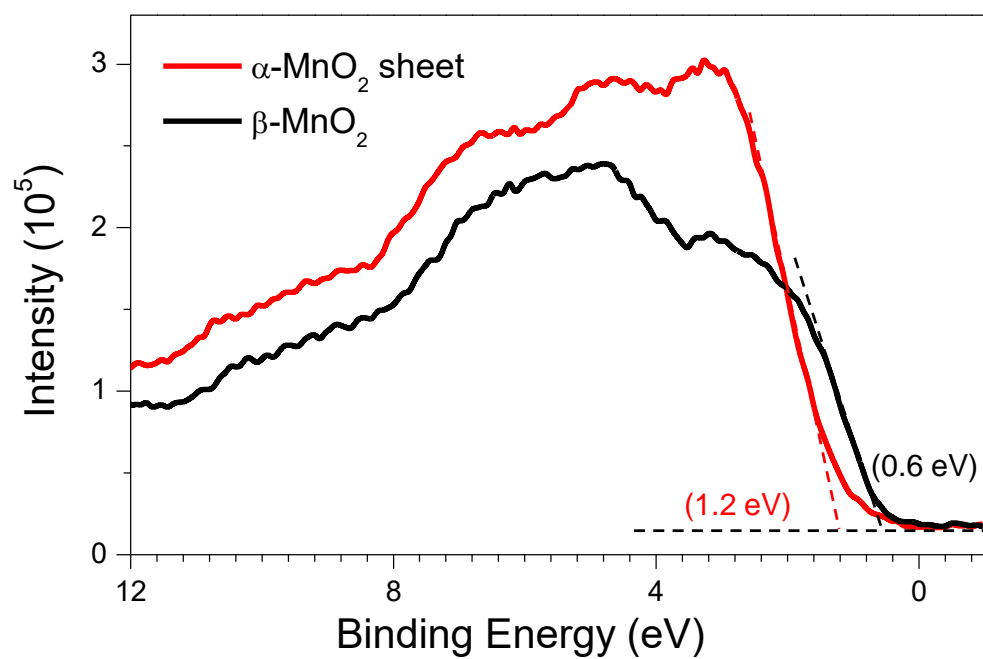

**Figure S7.** Valence-band XPS of  $\alpha$ -MnO<sub>2</sub> sheets and  $\beta$ -MnO<sub>2</sub>.
